# Supplementary material
Source: Springer Nature journal article supplement (https://www.springermedizin.de/resource/supplementary/13054_2008_7625_MOESM3_ESM.pdf/9730180)

ELF amikacin concentration ( $\mu\text{g/mL}$ )

16,000  
10,000  
3,000  
2,500  
2,000  
1,500  
1,000  
500  
128  
0

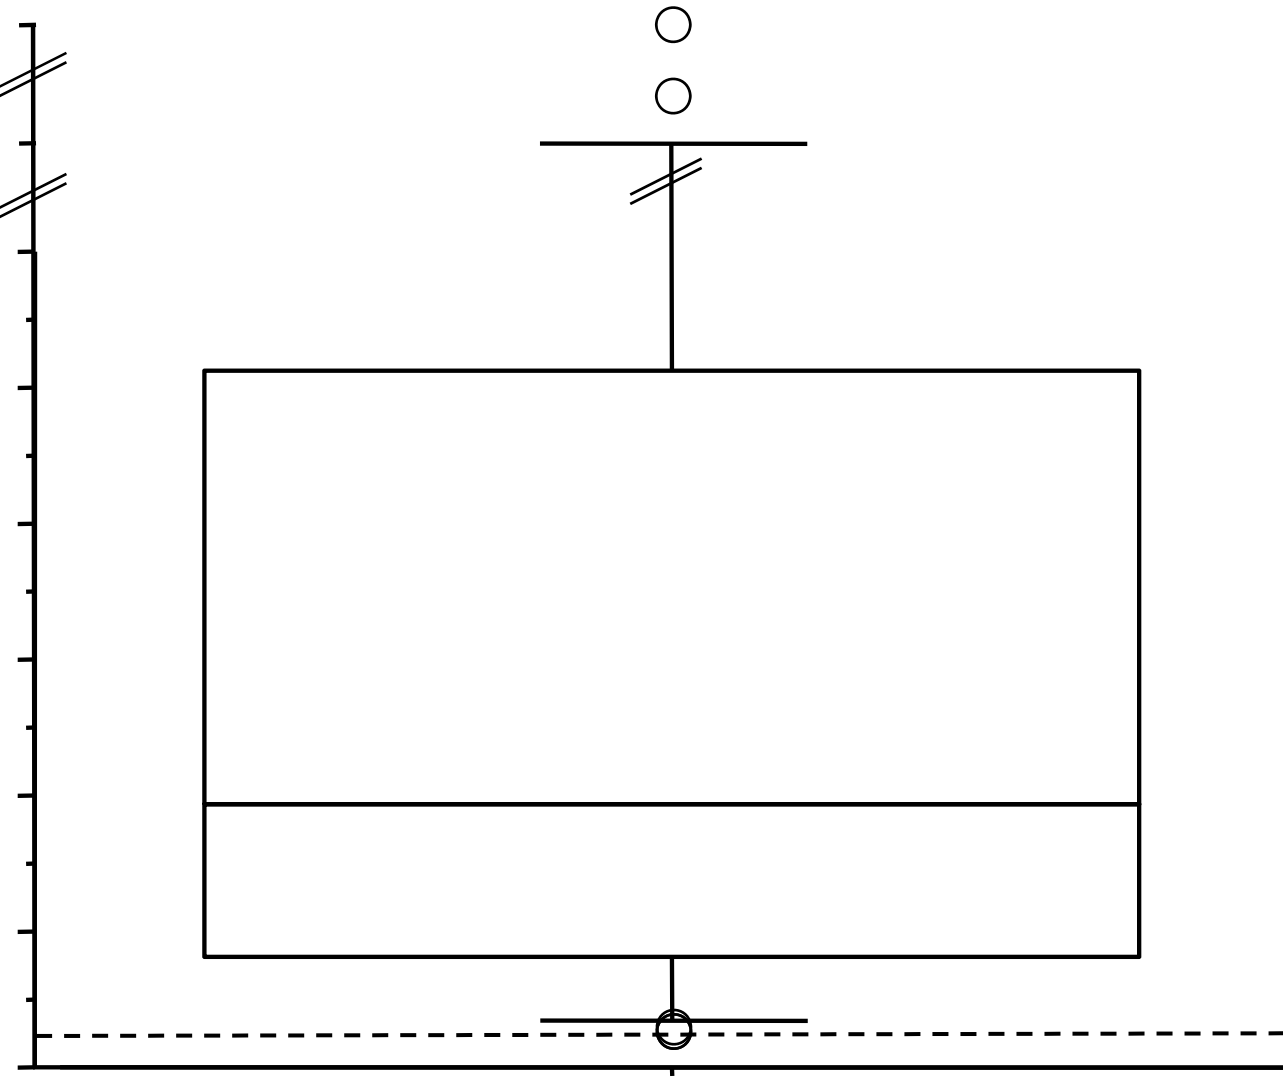

Supplement: MOESM3 [file 9730180]
